# Supplementary material for: Nonmedical Prescription Opioid Use among a Sample of College Students: Prevalence and Predictors
Source: MDPI journal article supplement (doi:10.3390/pharmacy9020106), 2021-05-28
Supplement: s1 [file s1]

**Supplementary Table S1.** Lifetime prevalence of nonmedical prescription opioid use by predictor variables.

| Predictors                                          | beta   | SE    | aOR   | 95% LB | 95% UB | two-tailed<br>p-value |
|-----------------------------------------------------|--------|-------|-------|--------|--------|-----------------------|
| Age                                                 | 0.131  | 0.216 | 1.140 | 0.746  | 1.743  | .545                  |
| Male Sex                                            | 0.190  | 0.187 | 1.210 | 0.839  | 1.745  | .308                  |
| Student of Color                                    | −0.412 | 0.448 | 0.663 | 0.275  | 1.595  | .359                  |
| Hispanic or Latinx                                  | 0.405  | 1.269 | 1.499 | 0.125  | 18.031 | .750                  |
| GPA                                                 | −0.304 | 0.240 | 0.738 | 0.461  | 1.182  | .206                  |
| Year in College                                     | 0.043  | 0.201 | 1.044 | 0.704  | 1.546  | .831                  |
| Member of Fraternity or Sorority                    | 0.332  | 0.300 | 1.394 | 0.774  | 2.508  | .268                  |
| Alcohol                                             | 0.575  | 0.102 | 1.777 | 1.455  | 2.171  | <b>&lt;.001</b>       |
| Marijuana Use                                       | −0.078 | 0.443 | 0.925 | 0.388  | 2.206  | .861                  |
| Nonmedical Use of Benzodiazapine Medication         | 1.911  | 0.305 | 6.758 | 3.718  | 12.284 | <b>&lt;.001</b>       |
| Nonmedical Use of Prescription Stimulant Medication | 1.019  | 0.119 | 2.770 | 2.196  | 3.495  | <b>&lt;.001</b>       |
| Metacognition                                       | −0.120 | 0.007 | 0.887 | 0.875  | 0.899  | <b>&lt;.001</b>       |
| Behavioral Regulation                               | 0.258  | 0.131 | 1.294 | 1.002  | 1.673  | <b>.049</b>           |
| Depression                                          | 0.368  | 0.037 | 1.444 | 1.343  | 1.553  | <b>&lt;.001</b>       |
| Anxiety                                             | −0.186 | 0.057 | 0.830 | 0.743  | 0.927  | <b>.001</b>           |
| Pain Behavior                                       | 0.006  | 0.046 | 1.006 | 0.920  | 1.100  | .902                  |

*Notes.* Analytic sample of predictor models was  $n=847$ ; Missing data handled with FIML.

aOR = adjusted odds ratio; LB = lower bound; SE = standard error; UB = upper bound.
