# Supplementary material for: Nonmedical Prescription Opioid Use among a Sample of College Students: Prevalence and Predictors
Source: MDPI journal article supplement (doi:10.3390/pharmacy9020106), 2021-05-28
Supplement: s1 [file s1]

**Supplementary Table S2.** Motives for Nonmedical Prescription Opioid Use of Lifetime Users

| Main Motives                                                                | Total<br><i>n</i> | Never         | Hardly<br>Ever | Sometim<br>es | Often         | Very<br>Often |
|-----------------------------------------------------------------------------|-------------------|---------------|----------------|---------------|---------------|---------------|
| To relieve physical pain?                                                   | 80                | 29<br>(36.3%) | 18 (22.5%)     | 21<br>(26.3%) | 7 (8.8%)      | 5 (6.3%)      |
| Because it's fun?                                                           | 79                | 37<br>(46.8%) | 18 (22.8%)     | 14<br>(17.7%) | 6 (7.6%)      | 4 (5.1%)      |
| Because it gives you a pleasant feeling?                                    | 79                | 41<br>(51.9%) | 11 (13.9%)     | 10<br>(12.7%) | 8<br>(10.1%)  | 9 (11.4%)     |
| To get high?                                                                | 80                | 42<br>(52.5%) | 9 (11.3%)      | 14<br>(17.5%) | 10<br>(12.5%) | 5 (6.3%)      |
| Because you like the feeling?                                               | 80                | 44<br>(55.0%) | 11 (13.8%)     | 10<br>(12.5%) | 6 (7.5%)      | 9 (11.3%)     |
| To relax or relieve tension?                                                | 79                | 44<br>(55.7%) | 13 (16.5%)     | 11<br>(13.9%) | 6 (7.6%)      | 5 (6.3%)      |
| To experiment, see what it's like?                                          | 79                | 44<br>(55.7%) | 14 (17.7%)     | 9 (11.4%)     | 8<br>(10.1%)  | 4 (5.1%)      |
| Because it helps you sleep?                                                 | 79                | 45<br>(57.0%) | 13 (16.5%)     | 14<br>(17.7%) | 3 (3.8%)      | 4 (5.1%)      |
| To decrease anxiety?                                                        | 79                | 45<br>(57.0%) | 14 (17.7%)     | 9 (11.4%)     | 6 (7.6%)      | 5 (6.3%)      |
| Because it helps you when you feel depressed or nervous?                    | 78                | 47<br>(60.3%) | 13 (16.7%)     | 8 (10.3%)     | 7 (9.0%)      | 3 (3.8%)      |
| For pain related to an injury?                                              | 79                | 49<br>(62.0%) | 10 (12.7%)     | 12<br>(15.2%) | 8<br>(10.1%)  | 0 (0.0%)      |
| To forget about your problems?                                              | 79                | 50<br>(63.3%) | 11 (13.9%)     | 6 (7.6%)      | 7 (8.9%)      | 5 (6.3%)      |
| To forget your worries?                                                     | 79                | 50<br>(63.3%) | 11 (13.9%)     | 7 (8.9%)      | 6 (7.6%)      | 5 (6.3%)      |
| For headaches?                                                              | 80                | 51<br>(63.7%) | 9 (11.3%)      | 14<br>(17.5%) | 4 (5.0%)      | 2 (2.5%)      |
| To cheer up when you're in a bad mood?                                      | 78                | 51<br>(65.4%) | 13 (16.7%)     | 5 (6.4%)      | 3 (3.8%)      | 6 (7.7%)      |
| Because it's exciting?                                                      | 79                | 54<br>(68.4%) | 11 (13.9%)     | 3 (3.8%)      | 7 (8.9%)      | 4 (5.1%)      |
| For muscle aches?                                                           | 79                | 54<br>(68.4%) | 13 (16.5%)     | 6 (7.6%)      | 5 (6.3%)      | 1 (1.3%)      |
| Because it helps you enjoy a party?                                         | 80                | 55<br>(68.8%) | 10 (12.5%)     | 10<br>(12.5%) | 3 (3.8%)      | 2 (2.5%)      |
| For pain conditions such as menstrual cramps, joint problems, or arthritis? | 79                | 55<br>(69.6%) | 7 (8.9%)       | 7 (8.9%)      | 6 (7.6%)      | 4 (5.1%)      |
| Because it makes social gatherings more fun?                                | 79                | 56<br>(70.9%) | 8 (10.1%)      | 9 (11.4%)     | 4 (5.1%)      | 2 (2.5%)      |
| To be sociable?                                                             | 80                | 60<br>(75.0%) | 9 (11.3%)      | 7 (8.8%)      | 2 (2.5%)      | 2 (2.5%)      |
| To celebrate a special occasion with friends?                               | 79                | 60<br>(75.9%) | 7 (8.9%)       | 7 (8.9%)      | 2 (2.5%)      | 3 (3.8%)      |
| Because you feel more self-confident or sure of yourself?                   | 79                | 60<br>(75.9%) | 7 (8.9%)       | 7 (8.9%)      | 3 (3.8%)      | 2 (2.5%)      |
| Because it improves parties and celebrations?                               | 79                | 60<br>(75.9%) | 9 (11.4%)      | 7 (8.9%)      | 1 (1.3%)      | 2 (2.5%)      |
| For back or neck problems?                                                  | 78                | 60<br>(76.9%) | 10 (12.8%)     | 6 (7.7%)      | 0 (0.0%)      | 2 (2.6%)      |
| Because it is safer than street drugs?                                      | 79                | 66<br>(83.5%) | 5 (6.3%)       | 5 (6.3%)      | 2 (2.5%)      | 1 (1.3%)      |
| To counteract the effects of other drugs?                                   | 79                | 67<br>(84.8%) | 6 (7.6%)       | 4 (5.1%)      | 1 (1.3%)      | 1 (1.3%)      |
| Because you are addicted?                                                   | 78                | 68<br>(87.2%) | 6 (7.7%)       | 2 (2.6%)      | 0 (0.0%)      | 2 (2.6%)      |
